# Supplementary material for: Lovastatin, an Up-Regulator of Low-Density Lipoprotein Receptor, Enhances Follicular Development in Mouse Ovaries
Source: MDPI journal article supplement (doi:10.3390/ijms24087263), 2023-04-14
Supplement: s1 [file s1]

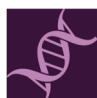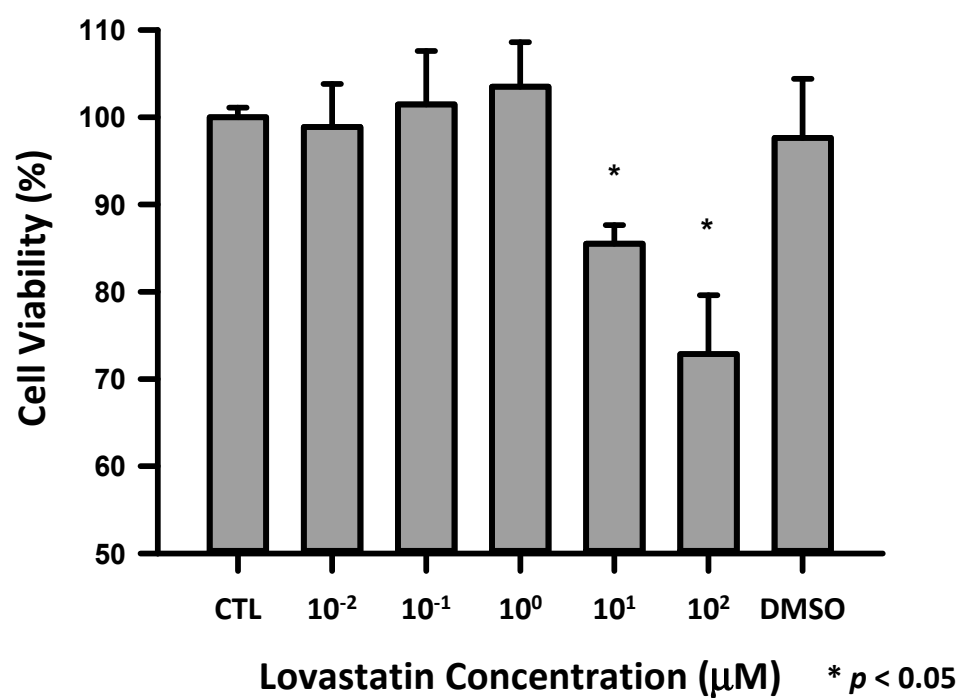

**Figure S1.** Cytotoxicity of lovastatin in the HEK293 cell line.

**Table S1.** RT-PCR and quantitative real-time PCR primers.

| Primer         | Gene                                   |   | Sequence (5'-3')               |
|----------------|----------------------------------------|---|--------------------------------|
| <b>LDLR</b>    | Low density lipoprotein receptor       | F | TGA TGG CCC CAA CAA GTT CA     |
|                |                                        | R | CTC GTT GGT CTT GCA CTC CT     |
| <b>StAR</b>    | Steroidogenic acute regulatory protein | F | TGT CTC CCA CTG CAT AGC TG     |
|                |                                        | R | CCG ATC CTT AGC ATC CCC TG     |
| <b>AMH</b>     | Anti-Mullerian hormone                 | F | CCA ATA CCA GGG GCC TCA TC     |
|                |                                        | R | GCT TGT GTT CCC CTC TCC TC     |
| <b>GDF9</b>    | Growth Differentiation Factor 9        | F | AAA AGA CCA GGT GCC AGA GG     |
|                |                                        | R | GGT GGA CTG AAG AGA CTG CC     |
| <b>BMP15</b>   | Bone morphogenetic protein 15          | F | CTC CTT GCT GAC GAC CCT AC     |
|                |                                        | R | GGT CAG CCG AAC GAT GGT AT     |
| <b>Oct3/4</b>  | Octamer-binding transcription factor 4 | F | TGT TCA GCC AGA CCA CCA TC     |
|                |                                        | R | GCT TCC TCC ACC CAC TTC TC     |
| <b>Nanog</b>   | Nanog                                  | F | GCA GAA GTA CCT CAG CCT CC     |
|                |                                        | R | ACC GCT TGC ACT TCA TCC TT     |
| <b>Sox2</b>    | SRY-Box Transcription Factor 2         | F | AGG AGA GAA GTT TGG AGC CC     |
|                |                                        | R | TCT GGC GGA GAA TAG TTG GG     |
| <b>β-actin</b> | beta-actin                             | F | CAT TGC TGA CAG GAT GCA GAA GG |
|                |                                        | R | TGC TGG AAG GTG GAC AGT GAG G  |
